# Supplementary material
Source: Research Square preprint supplement (doi:10.21203/rs.3.rs-9690275/v1)
Supplement: Supplementary file 1 [file a7a0209657c769e98261ad6a.docx]

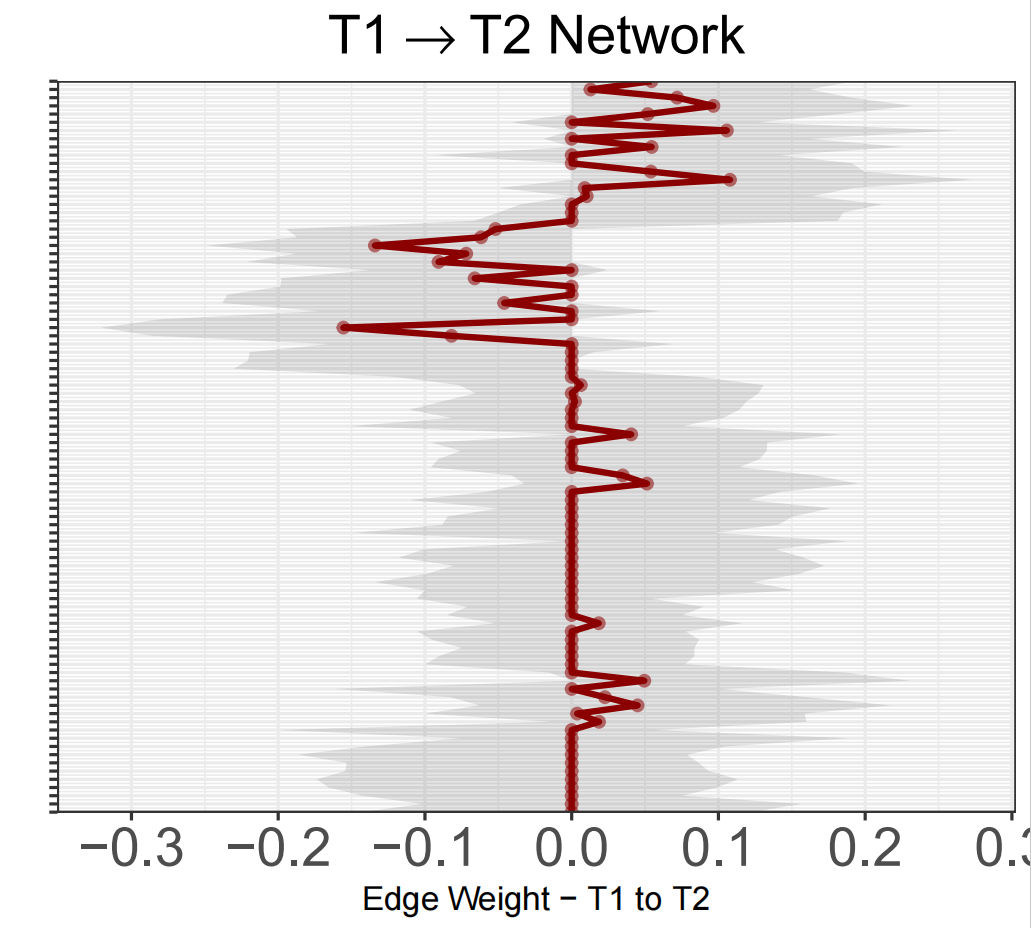


Supplementary Figure 1. Bootstrapped confidence intervals of edge weights (T1 → T2) in the cross‑lagged panel network for adolescents with anxiety and depression.


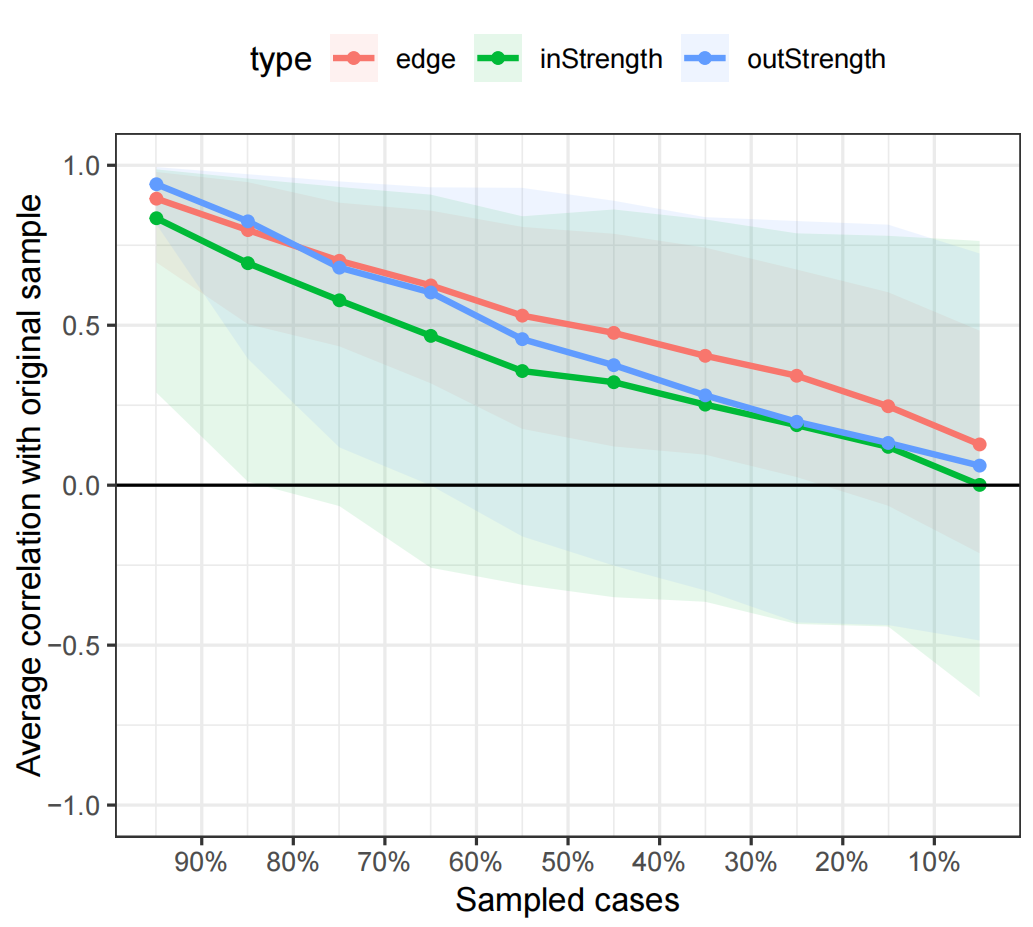


Supplementary Figure 2. Stability of centrality indices in the cross‑lagged panel network of SCL‑90 symptom dimensions from T1 to T2 in adolescents with anxiety and depression


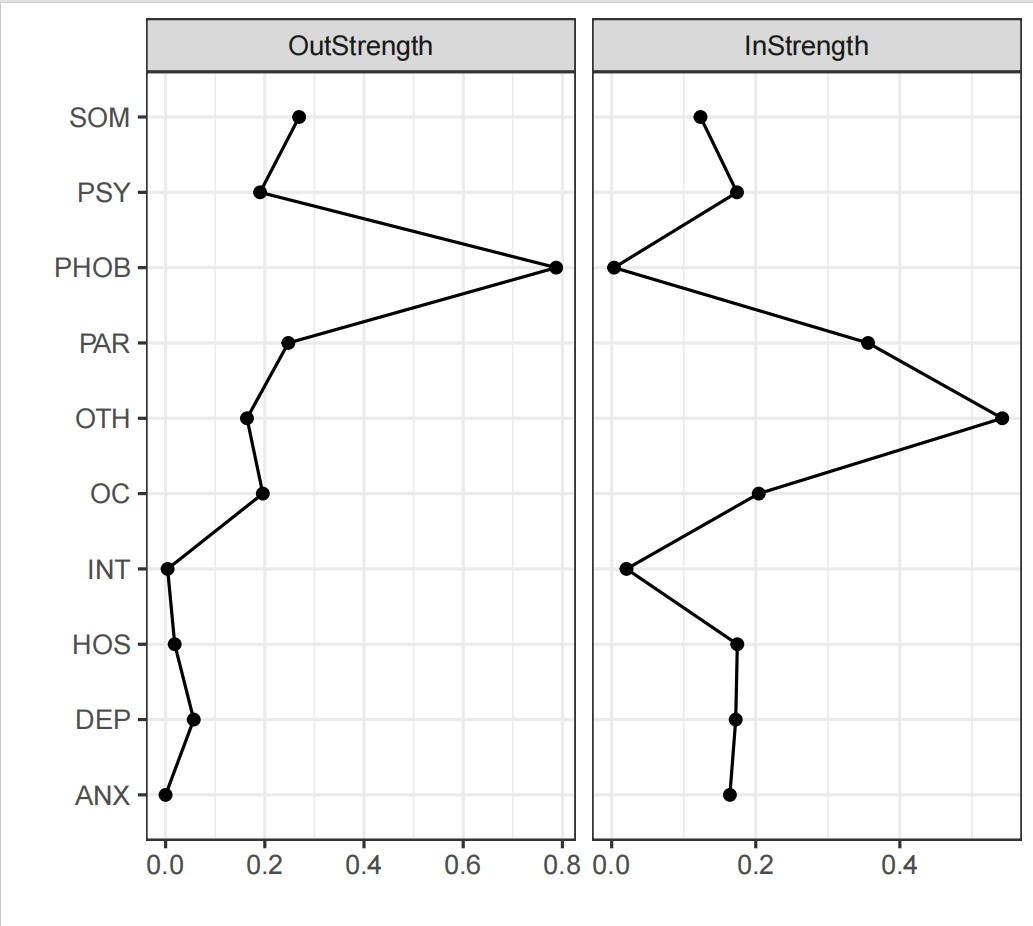


Supplementary Figure 3.Node strength predictive indices of SCL-90 symptom dimensions from T1 to T2 in adolescents with anxiety and depression

Supplementary Table 1. Edge weights of SCL‑90 symptom dimensions at T1 in adolescents with anxiety and depression

| From | To | Weight |
| --- | --- | --- |
| INT | PAR | 0.383 |
| SOM | ANX | 0.323 |
| PAR | PSY | 0.268 |

Supplementary Table 2. Edge weights of SCL‑90 symptom dimensions at T2 in adolescents with anxiety and depression

| From | To | Weight |
| --- | --- | --- |
| SOM | ANX | 0.322 |
| INT | PAR | 0.279 |
| PAR | PSY | 0.256 |
